# Supplementary material
Source: publisher figshare collection journal article supplement (https://frontiersin.figshare.com/ndownloader/files/26009897)
Supplement: Supplementary file 1 [file 26009897]

**Table S1.** Variables for cores analysed in the study. The data was standardised during analyses. **Bolded** variables were included into further analysis.

| **Variable** | **Code** |
| --- | --- |
| Diatom concentration [ind./cm3] | Diatoms |
| **pH** | **pH** |
| **CaCO3 [%]** | **CaCO3** |
| **Organic matter [%]** | **OM** |
| Mineral matter [%] | MM |
| **K [mg/g]** | **K** |
| Ca [mg/g] | Ca |
| Fe [mg/g] | Fe |
| Pb [𝝁g/g] | Pb |
| Silt [%] | silt |
| **Sand [%]** | **sand** |
| **Wood [%]** | **wood** |
| ***Urtica dioica* [%]** | **U. dioica** |
| *Rorippa palustris* [%] | R. palustris |
| *Cyperus fuscus* [%] | C. fuscus |
| ***Carex* sp. [%]** | **Carex sp.** |
| *Mentha aquatica* [%] | M. aquatica |
| *Oenanthe aquatica* [%] | O. aquatica |
| *Lycopus europaeus* [%] | L. europaeus |
| *Phragmites australis* [%] | P. australis |
| *Hydrocaris morsus-ranae* [%] | H. morsus-ranae |
| *Alisma plantago-aquatica* [%] | A.plantago-aquatica |
| *Lemna* sp. | Lemna sp. |
| *Nuphar lutea* [%] | N. lutea |
| *Batrachium* sp. [%] | Batrachium sp. |
| *Sparganium erectum* [%] | S. erectum |
| *Potamogeton* sp. [%] | Potamogeton sp. |
| *Filipendula ulmaria* [%] | F. ulmaria |
